# Supplementary material for: Selective Targeting of the Interconversion between Glucosylceramide and Ceramide by Scaffold Tailoring of Iminosugar Inhibitors
Source: PubMed Central journal article supplement (PMC6359432; doi:10.3390/molecules24020354), 2019-01-19

**Supplementary Information**

**Selective targeting of the interconversion between glucosylceramide and ceramide by scaffold tailoring of iminosugar inhibitors**

**Cécile Baudoin-Dehoux,\* Tessa Castellan, Frédéric Rodriguez, Arnaud Rives, Fabien Stauffert, Virginie Garcia, Thierry Levade, Philippe Compain\* and Yves Génisson\***

## List of contents

|                      |                                                                                         |   |
|----------------------|-----------------------------------------------------------------------------------------|---|
| <b>Figure S1.</b>    | $^1\text{H}$ and $^{13}\text{C}$ NMR spectra of compound <b>6b</b> -----                | 3 |
| <b>Figure S2</b>     | $^1\text{H}$ and $^{13}\text{C}$ NMR spectra of compound <b>8</b> -----                 | 4 |
| <b>Figures S3-S8</b> | IC <sub>50</sub> curves for compounds <b>5a-5c</b> and <b>6a, 6b</b> and <b>8</b> ----- | 5 |

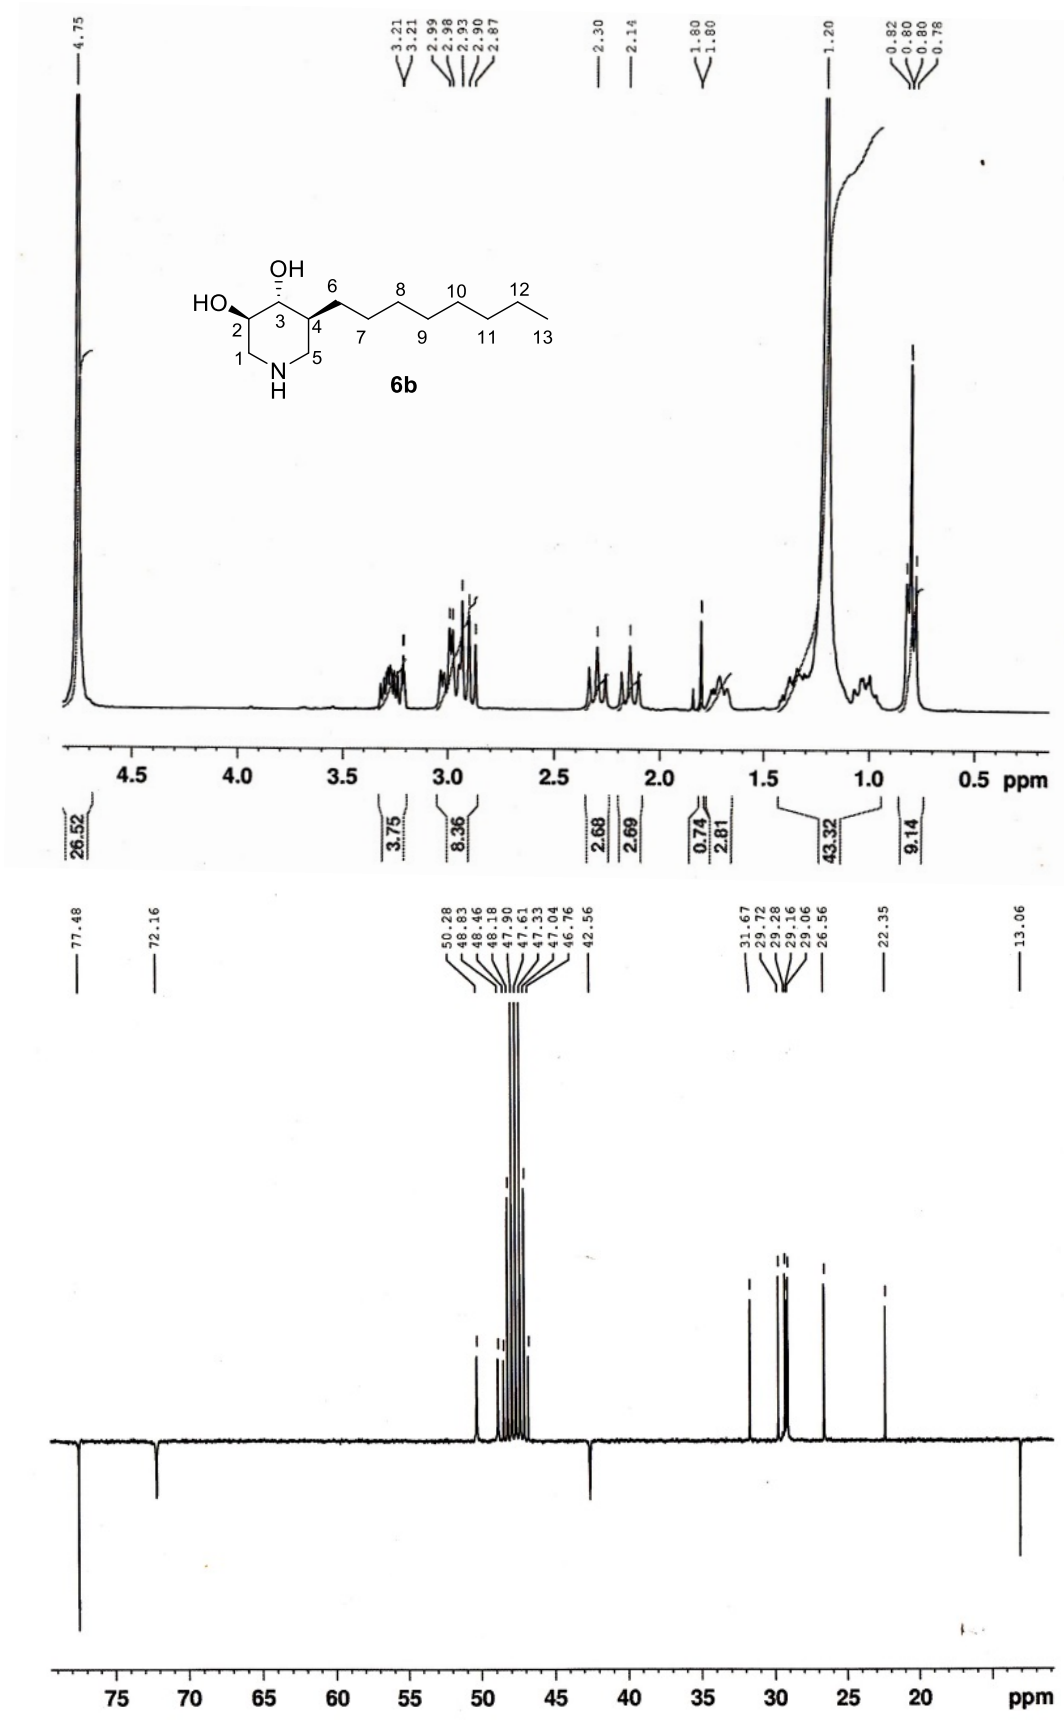

**Figure S1.** <sup>1</sup>H and <sup>13</sup>C spectra (300 MHz, 75 MHz, CD<sub>3</sub>OD) of **6b**



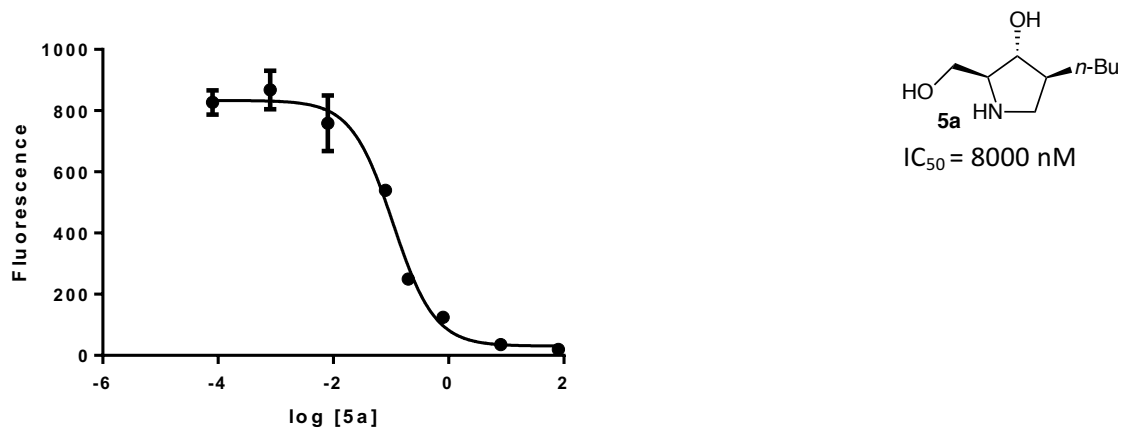

Figure S3: dose-response curve of recombinant GBA inhibition by compound 5a at pH 5.4

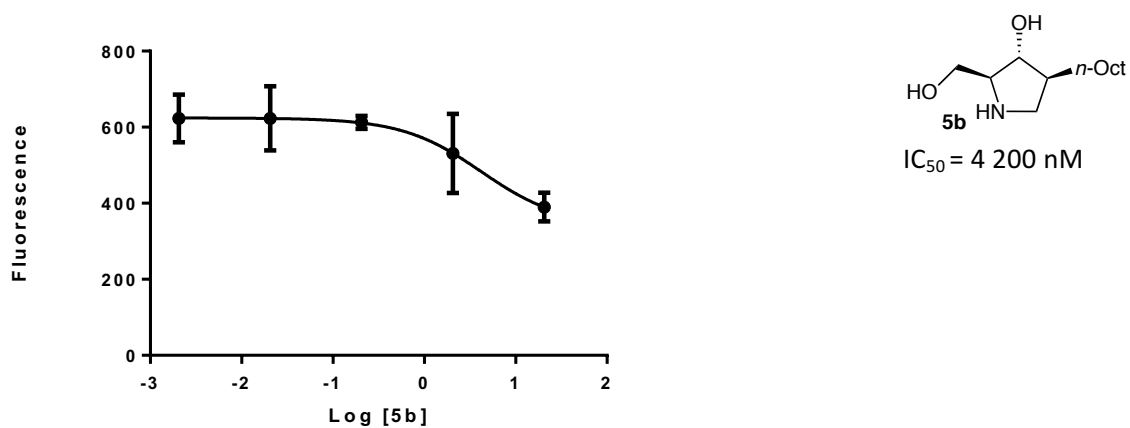

Figure S4: dose-response curve of recombinant GBA inhibition by compound 5b at pH 5.4

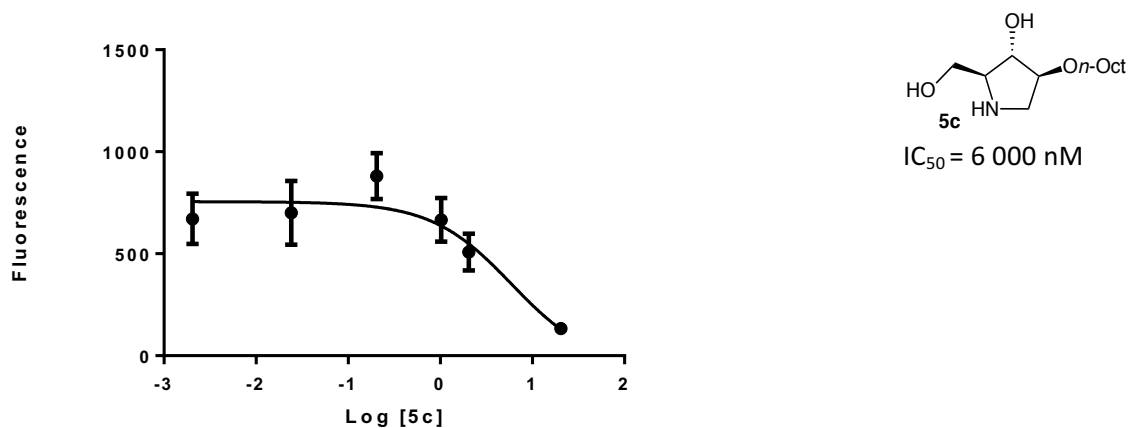

Figure S5: dose-response curve of recombinant GBA inhibition by compound 5c at pH 5.4

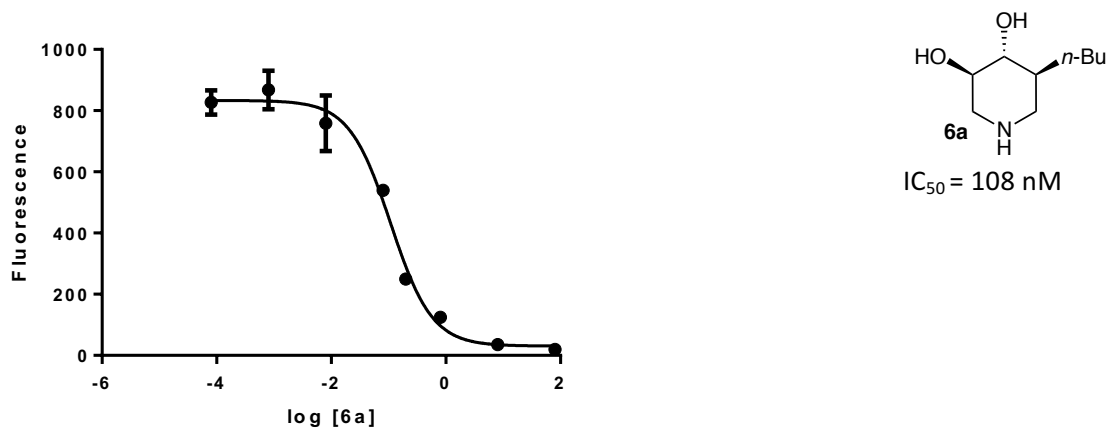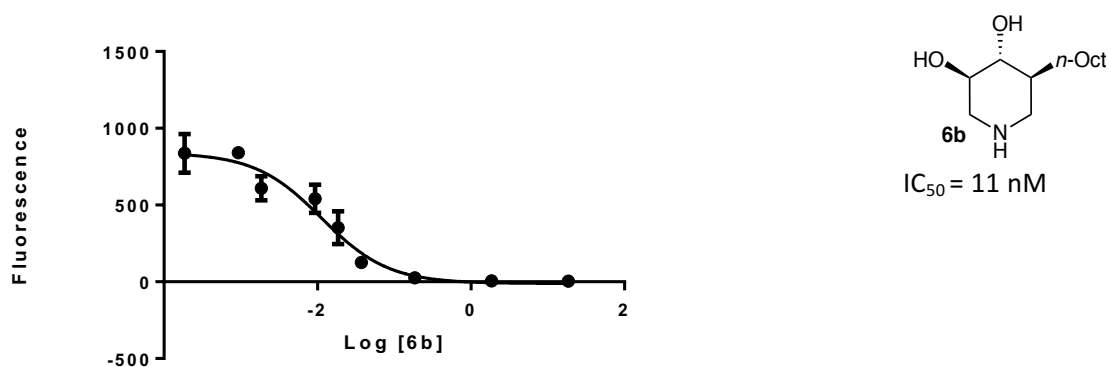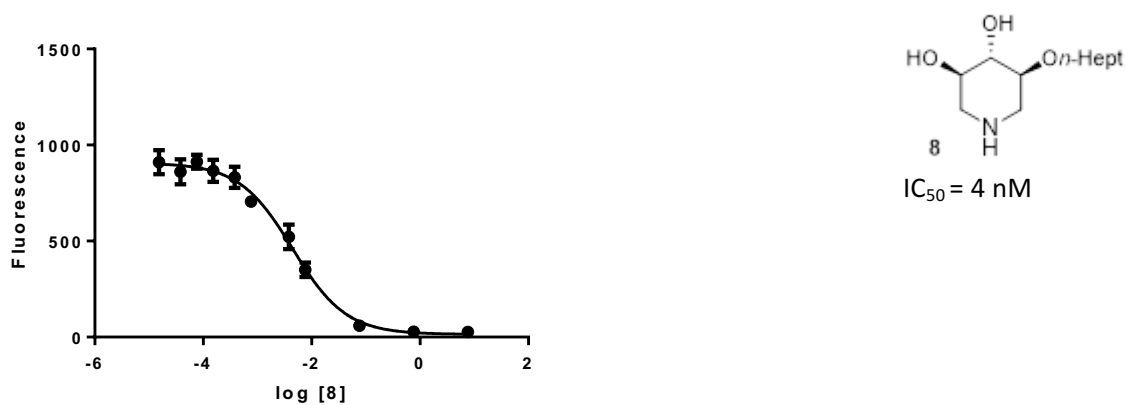

Supplement: molecules-24-00354-s001.pdf [file molecules-24-00354-s001.pdf]
